# Supplementary material for: Application of a robust solid-phase microextraction fiber consisting of NiTi wires coated with polypyrrole for the determination of haloanisoles in water and wine
Source: Royal Society of Chemistry journal article supplement (doi:10.1039/c6ay00995f), 2016-01-01

## SUPPLEMENTARY INFORMATION

**Application of robust solid-phase microextraction fiber consisting of NiTi wire coated  
with polypyrrole for determination of haloanisoles in water and wine**

**Kalya Cravo Di Pietro Roux<sup>a</sup>, Éverton Fabian Jasinski<sup>b</sup>, Josias Merib<sup>a</sup>, Maria Luísa  
Sartorelli<sup>b</sup>, Eduardo Carasek<sup>a</sup>.**

<sup>a</sup> *Departamento de Química, Universidade Federal de Santa Catarina, Florianópolis, SC 88040-  
900, Brazil.*

<sup>b</sup> *Departamento de Física, Universidade Federal de Santa Catarina, Florianópolis, SC 88040-  
900, Brazil.*

Table S1. Matrix of experiments corresponding to the full factorial design used for the optimization of potential and amount of charge.

| Experiment        | Potential (Volts) | Charge (Coulomb) |
|-------------------|-------------------|------------------|
| 1                 | 1.2               | 0.08             |
| 2                 | 1.8               | 0.08             |
| 3                 | 1.2               | 0.40             |
| 4                 | 1.8               | 0.40             |
| 5 (central point) | 1.5               | 0.24             |
| 6 (central point) | 1.5               | 0.24             |
| 7 (central point) | 1.5               | 0.24             |

Table S2. Matrix of experiments corresponding to the full factorial design used for the optimization of the experimental extraction conditions.

| Experiment         | Extraction Temperature (°C) | Extraction Time (min) | Mass of NaCl (g/20mL) |
|--------------------|-----------------------------|-----------------------|-----------------------|
| 1                  | 40                          | 20                    | 0                     |
| 2                  | 40                          | 20                    | 6                     |
| 3                  | 40                          | 60                    | 0                     |
| 4                  | 40                          | 60                    | 6                     |
| 5                  | 80                          | 20                    | 0                     |
| 6                  | 80                          | 20                    | 6                     |
| 7                  | 80                          | 60                    | 0                     |
| 8                  | 80                          | 60                    | 6                     |
| 9 (central point)  | 60                          | 40                    | 3                     |
| 10 (central point) | 60                          | 40                    | 3                     |
| 11(central point)  | 60                          | 40                    | 3                     |

Table S3. Matrix of experiments corresponding to the Doehlert design used for the optimization of the experimental extraction conditions.

| Experiment | Extraction Temperature (°C) | Mass of NaCl (g/20mL) |
|------------|-----------------------------|-----------------------|
| 1          | 40                          | 3                     |
| 2          | 40                          | 5                     |
| 3          | 50                          | 4                     |
| 4          | 50                          | 4                     |
| 5          | 50                          | 4                     |
| 6          | 50                          | 6                     |
| 7          | 60                          | 3                     |
| 8          | 60                          | 5                     |
| 9          | 50                          | 2                     |

Figure S1. Thermogravimetric curve of proposed PPy at 20°C min<sup>-1</sup> heating rate in nitrogen atmosphere.

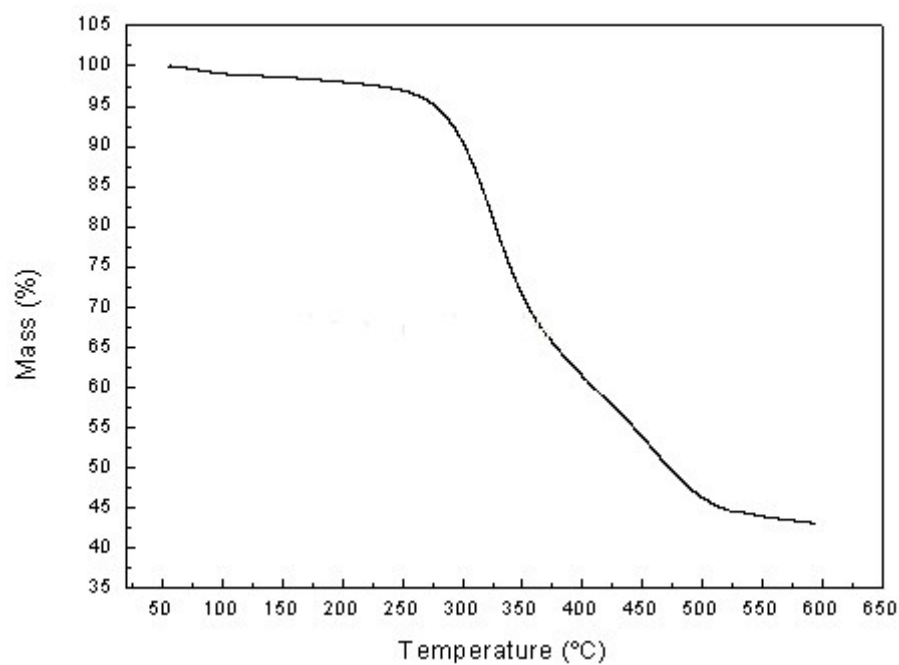

Supplement: c6ay00995f1.pdf [file c6ay00995f1.pdf]
